# Supplementary material
Source: Elsevier journal article supplement (https://www.sciencedirect.com/science/article/pii/S2531043723000399)
Supplement: mmc1 [file S2531043723000399:mmc1.docx]

**Supplementary Table 1**. **Multivariate Linear Regression Model for Pectoralis Muscle Area with the GOLD ABE Classification**. (n=1352)

| Parameter | **Pectoralis muscle area*** | | |
| --- | --- | --- | --- |
| Unstandardized β† | 95% CI | P Value |
| Age (per 1 year) | -0.28 | (-0.34, -0.22) | **<0.001** |
| Sex (male vs. female) | 12.02 | (10.44, 13.61) | **<0.001** |
| Body mass index (per 1 kg/m2) | 0.98 | (0.84, 1.11) | **<0.001** |
| Ex-smoker (vs. never smoker) | 1.36 | (-0.51, 3.23) | 0.16 |
| Current smoker (vs. never smoker) | 1.28 | (-0.35, 2.92) | 0.12 |
| Smoking index (per 1 pack-year) | -0.03 | (-0.05, -0.01) | **0.001** |
| Biomass exposure (yes vs. no) | 0.23 | (-0.61, 1.07) | 0.59 |
| Occupational history of dusts/gases/fumes (yes vs. no) | 0.22 | (-0.76,1.21) | 0.66 |
| Family history of respiratory diseases (yes vs. no) | -0.03 | (-1.16,1.10) | 0.96 |
| **GOLD A** (vs. normal spirometry) | -1.83 | (-2.82, -0.84) | **<0.001** |
| **GOLD B** (vs. normal spirometry) | -3.11 | (-5.26, -0.95) | **0.005** |
| **GOLD E** (vs. normal spirometry) | -3.58 | (-6.35, -0.80) | **0.012** |

* Multiple linear regression models included for age, sex, body mass index, smoking status, smoking index, biomass exposure, occupational history of dusts/gases/fumes, family history of respiratory diseases, and the GOLD ABE classification.

† Unstandardized β was the regression coefficient in multiple linear regression analysis that represented the extent of the independent variable's influence on the dependent variable.

Abbreviations: **GOLD**, Global Initiative for Chronic Obstructive Lung Disease; **CI**, confidence interval.
